# Supplementary material for: CAESAR: a cross-technology and cross-resolution framework for spatial omics annotation
Source: Research Square preprint supplement (doi:10.21203/rs.3.rs-5086440/v1), 2024-10-22
Supplement: Supplementary file 1 [file 0a4c28baa9cca1b496c5c010.xlsx]

## Sheet: Sample 1
B-cells

## Sheet: Sample 2
CAFs

## Sheet: Sample 3
B-cells

## Sheet: Sample 4
CAFs

## Sheet: Sample 5
B-cells

## Sheet: Sample 6
B-cells

## Sheet: Sample 7
B-cells

## Sheet: Sample 8
CAFs

## Sheet: Sample 9
B-cells

## Sheet: Sample 10
CAFs

[truncated: 16 more sheets: Sample 11, Sample 12, Sample 13, Sample 14, Sample 15, Sample 16, Sample 17, Sample 18, Sample 19, Sample 20, Sample 21, Sample 22, Sample 23, Sample 24, Sample 25, Sample 26]
